# Supplementary material
Source: Springer Nature journal article supplement (https://www.springermedizin.de/resource/supplementary/12885_2007_1040_MOESM1_ESM.pdf/9470962)

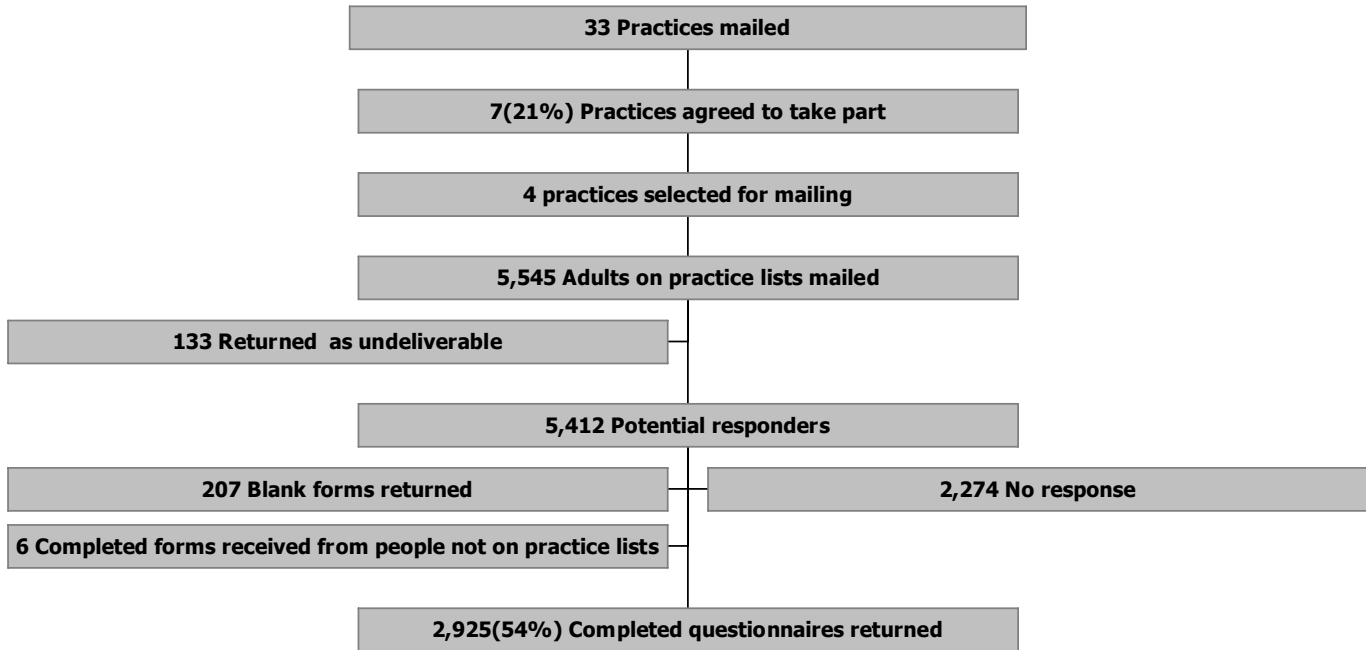

Supplement: MOESM1 [file 9470962]
